# Supplementary material for: Interzeolite Transformation from FAU-to-EDI Type of Zeolite
Source: MDPI journal article supplement (doi:10.3390/molecules29081744), 2024-04-11
Supplement: s1 [file s1]

## Supporting Information

### Interzeolite Transformation from FAU-to-EDI type of zeolite

*Stanislav Ferdov*

Physics Centre of Minho and Porto Universities (CF-UM-UP), University of Minho,  
4800-058 Guimarães, Portugal

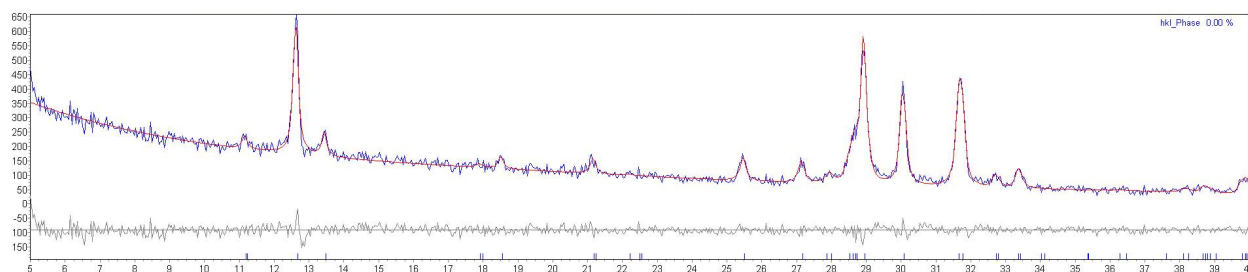

**Figure S1.** Sample no. 1 (S.G. I222)

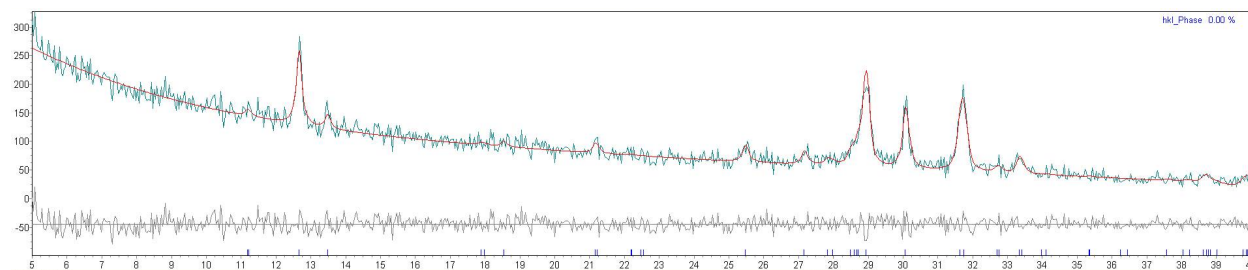

**Figure S2.** Sample no. 2 (S.G. I222).

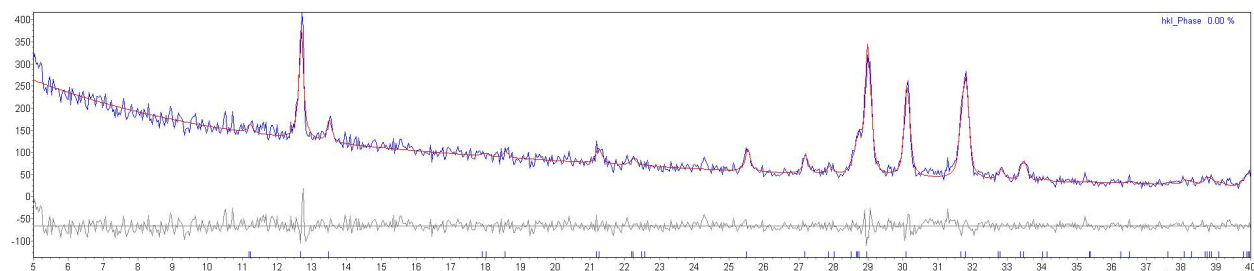

**Figure S3.** Sample no. 3 (S.G. I222).

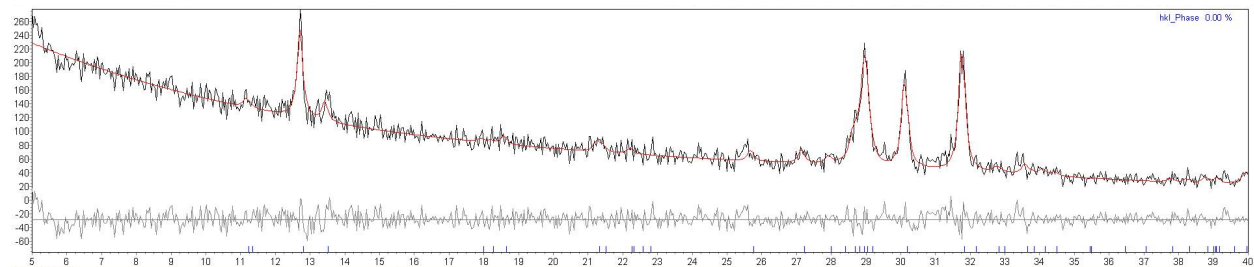

**Figure S4.** Sample no. 7 (S.G. I222).

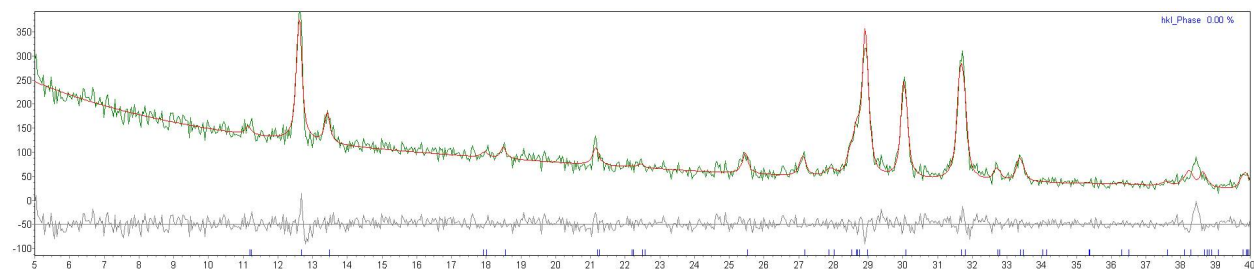

**Figure S5.** Sample no. 8 (S.G. I222).

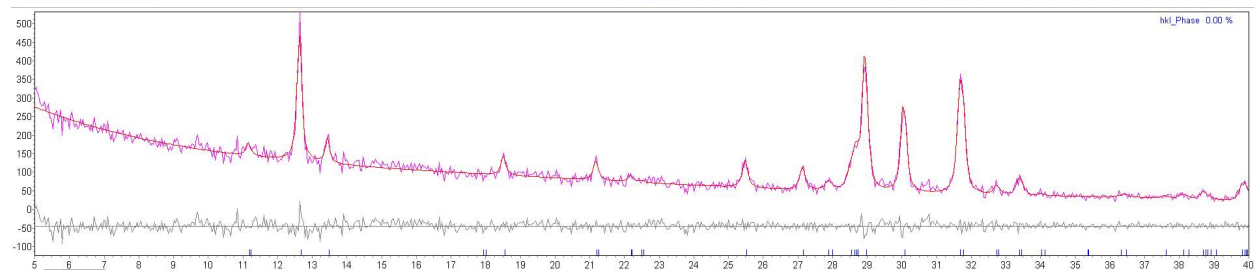

**Figure S6.** Sample no. 9 (S.G. I222).

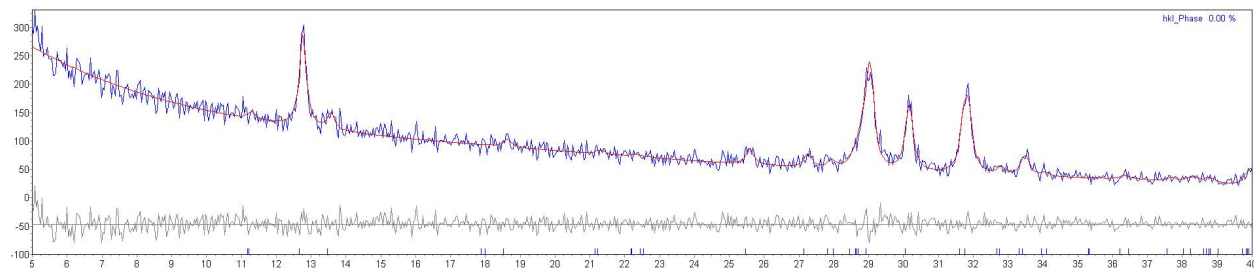

**Figure S7.** Sample no. 17 (S.G. I222).

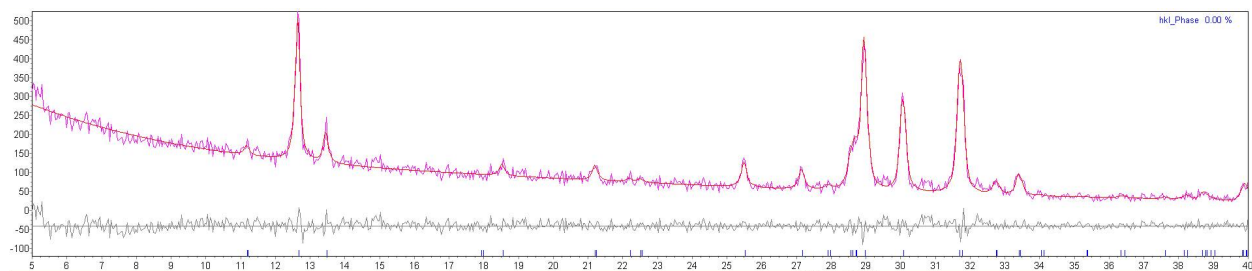

**Figure S8.** Sample no. 18 (S.G. I222).

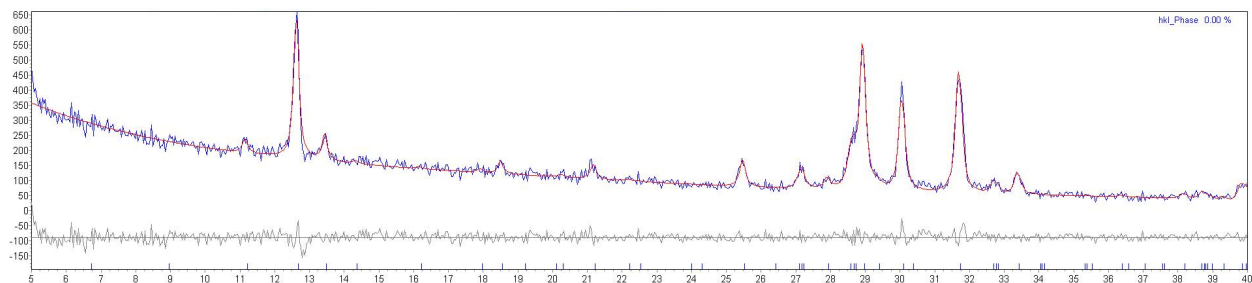

**Figure S9.** Sample no. 1 (S.G. P-42m).

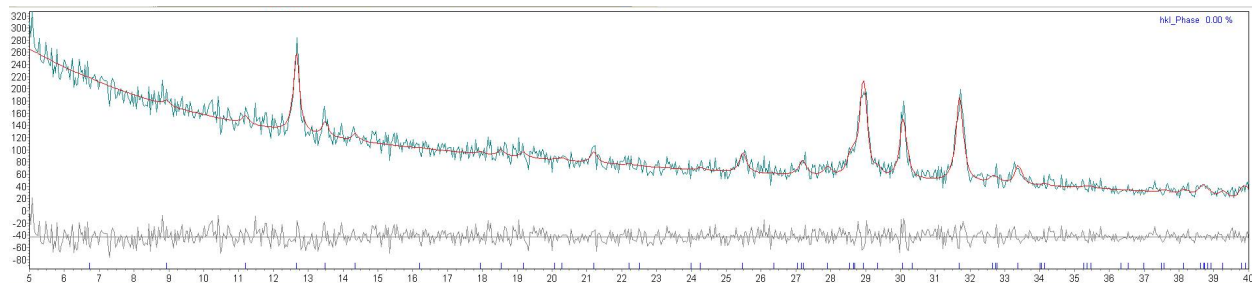

**Figure S10.** Sample no. 2 (S.G. P-42m).

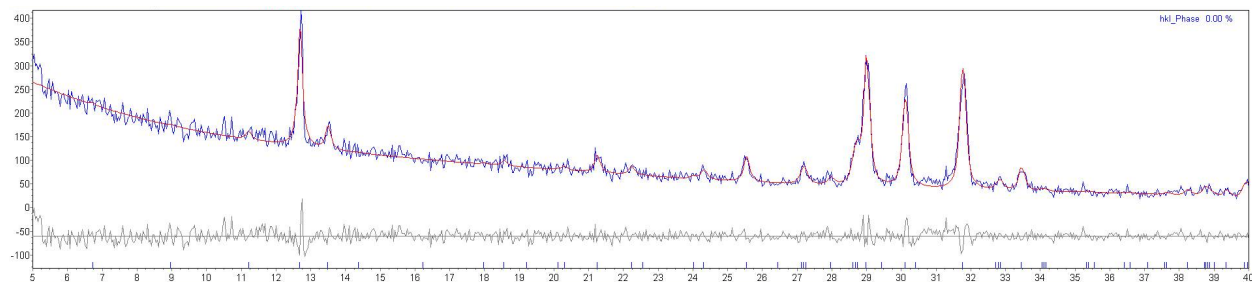

**Figure S11.** Sample no. 3 (S.G. P-42m).

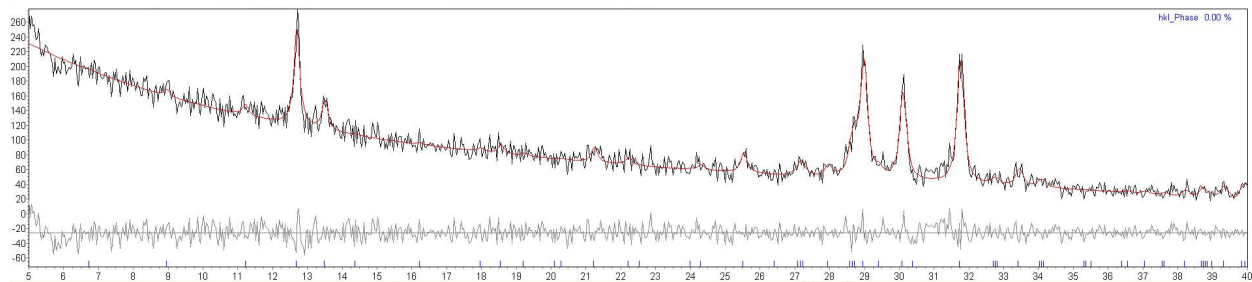

**Figure S12.** Sample no. 7 (S.G. P-42m).

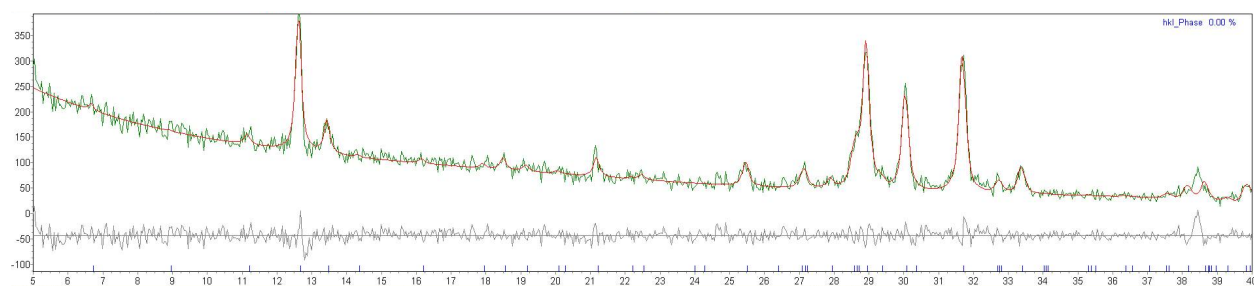

**Figure S13.** Sample no. 8 (S.G. P-42m).

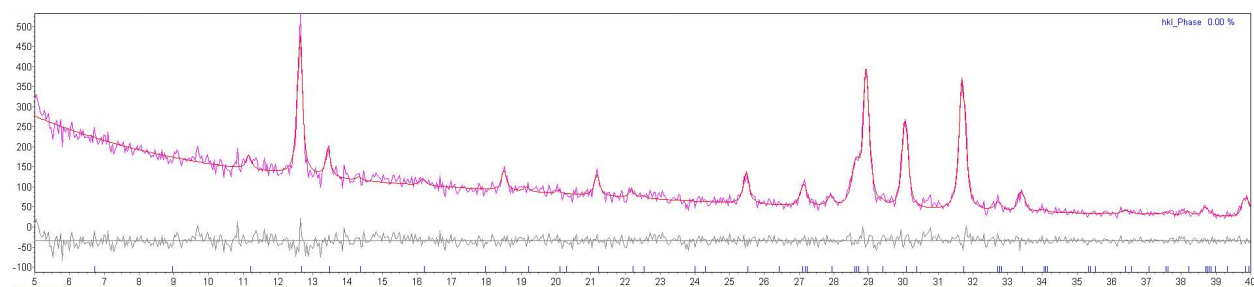

**Figure S14.** Sample no. 9 (S.G. P-42m).

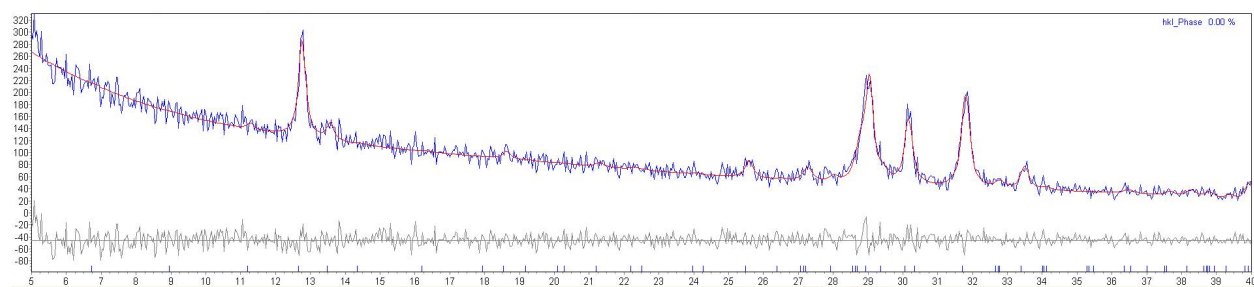

**Figure S15.** Sample no. 17 (S.G. P-42m).

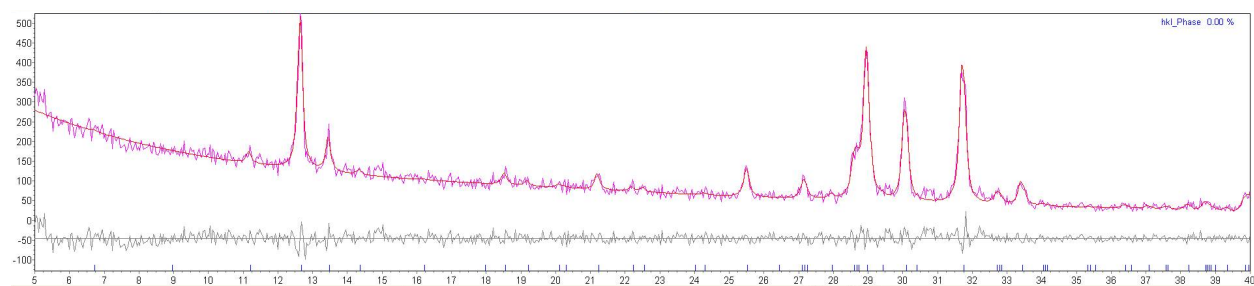

**Figure S16.** Sample no. 18 (S.G. P-42m).

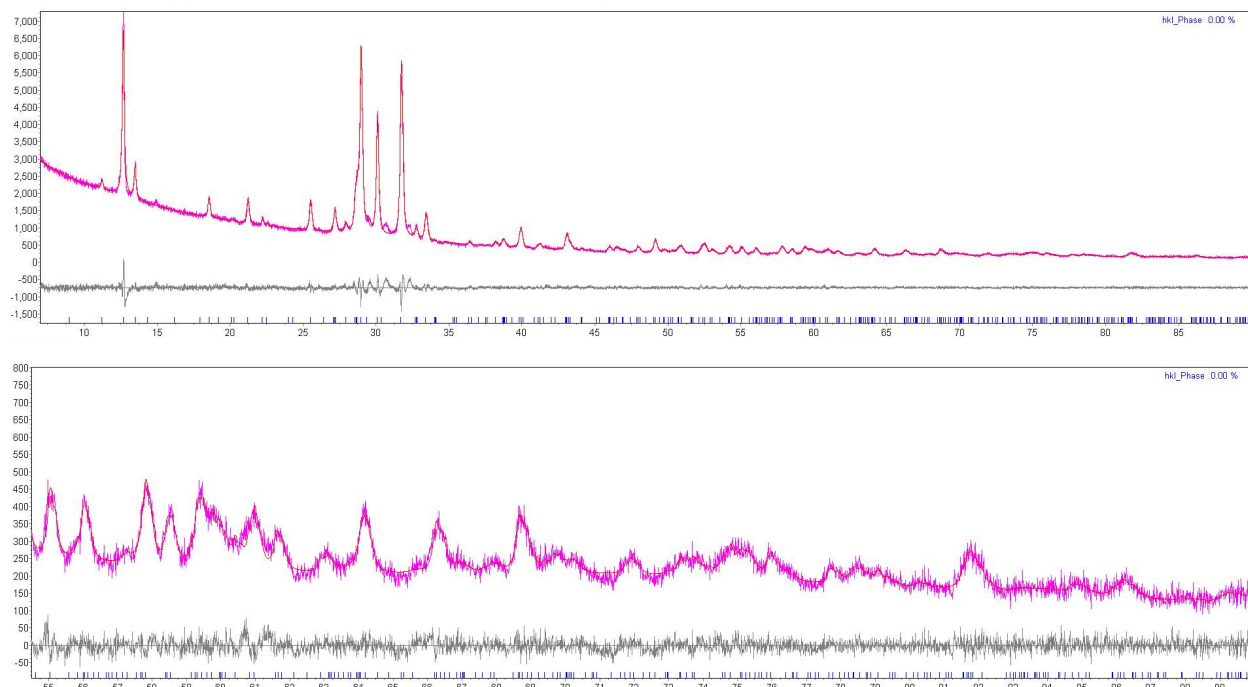

**Figure S17.** Le Bail fit of high-resolution PXRD data using space group P-42m (sample no. 8)  
Rwp: 5.49.

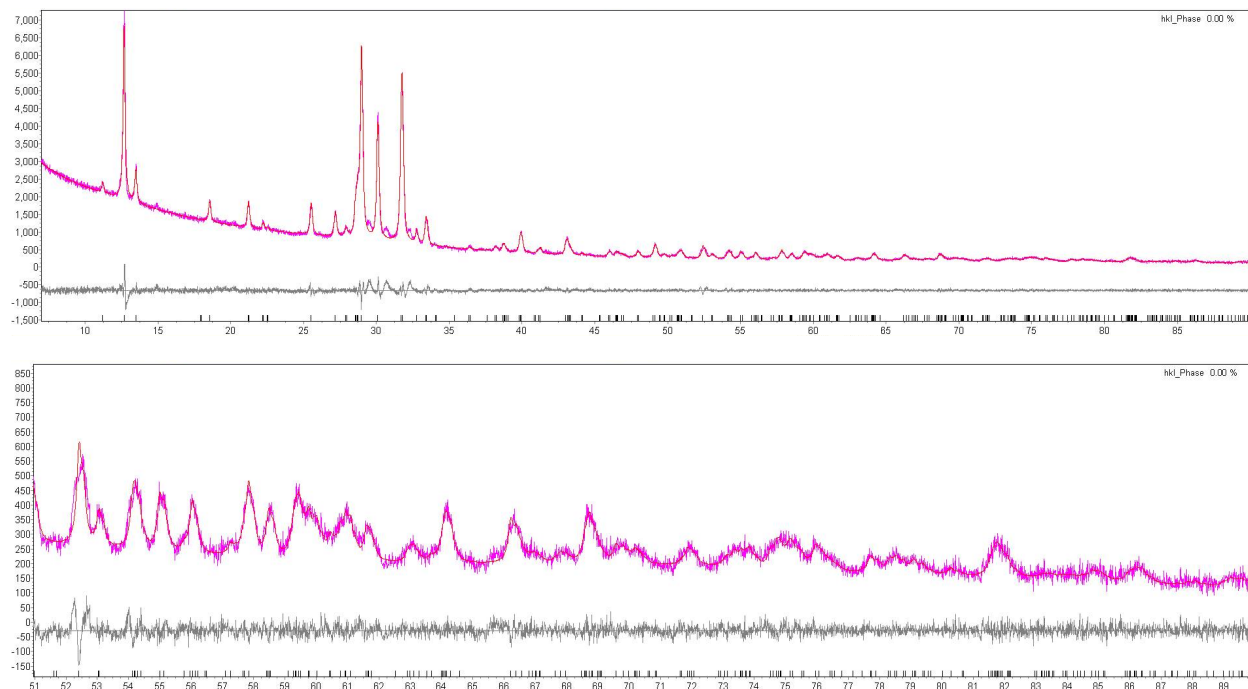

**Figure S18.** Le Bail fit of high-resolution PXRD data using space group I222 (sample no. 8)  
Rwp: 5.48.

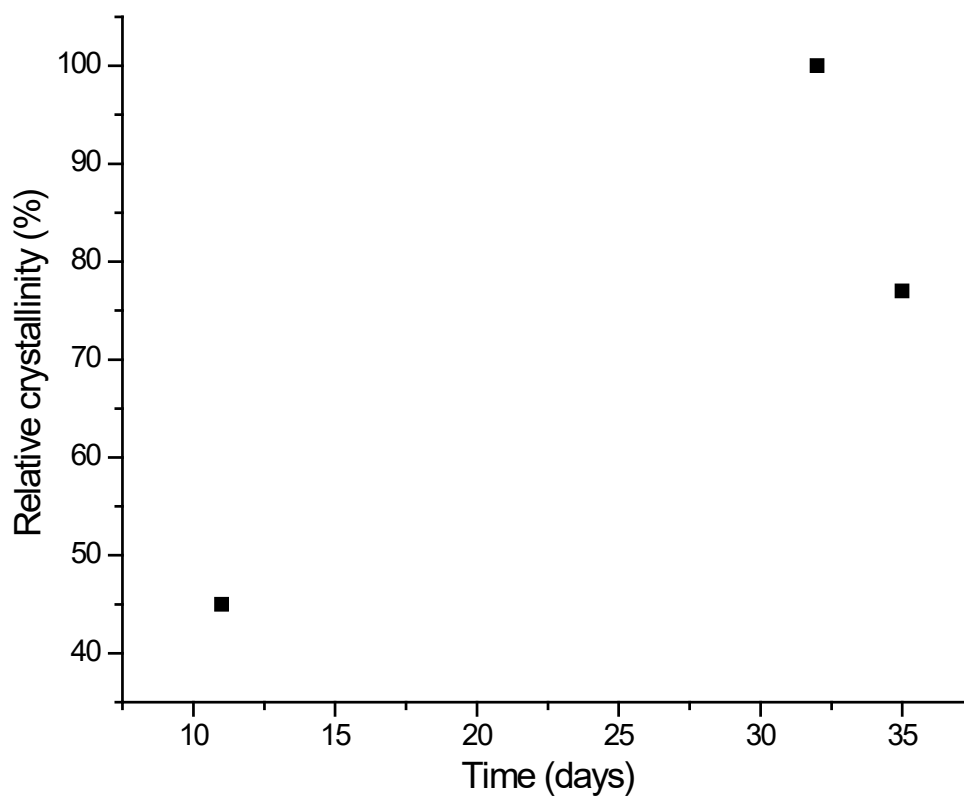

**Figure S19.** Change of the relative crystallinity of EDI zeolite during the EDI to FAU IZT at RT.

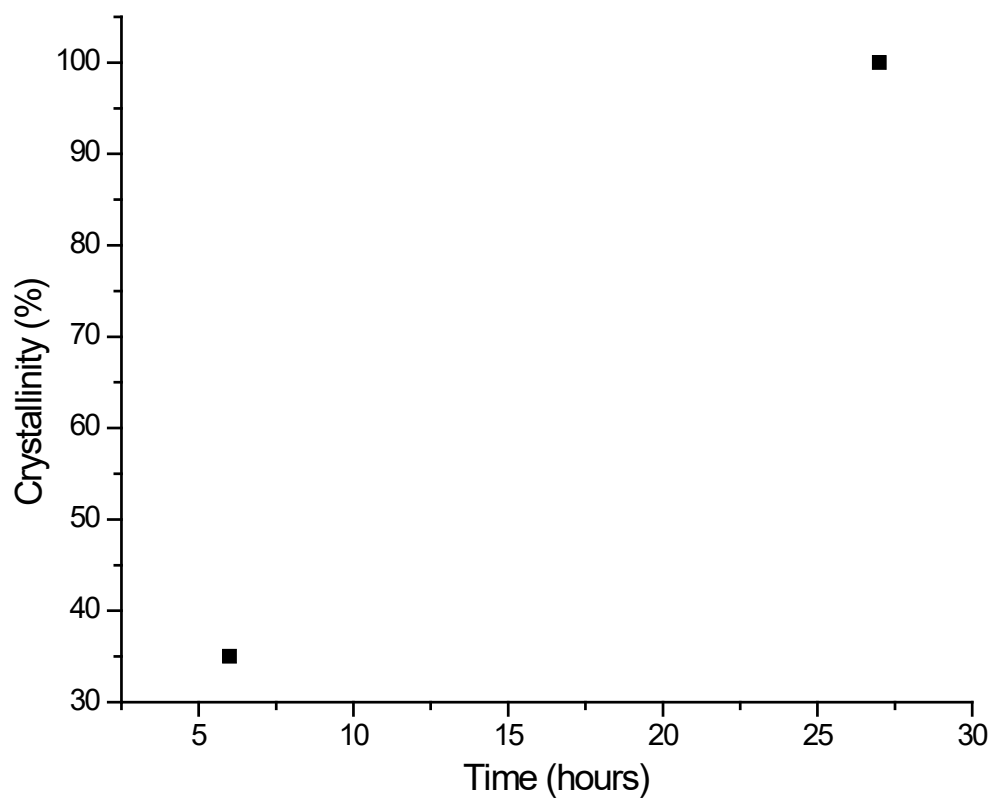

**Figure S20.** Change of the relative crystallinity of EDI zeolite during the EDI to FAU IZT at HT conditions.

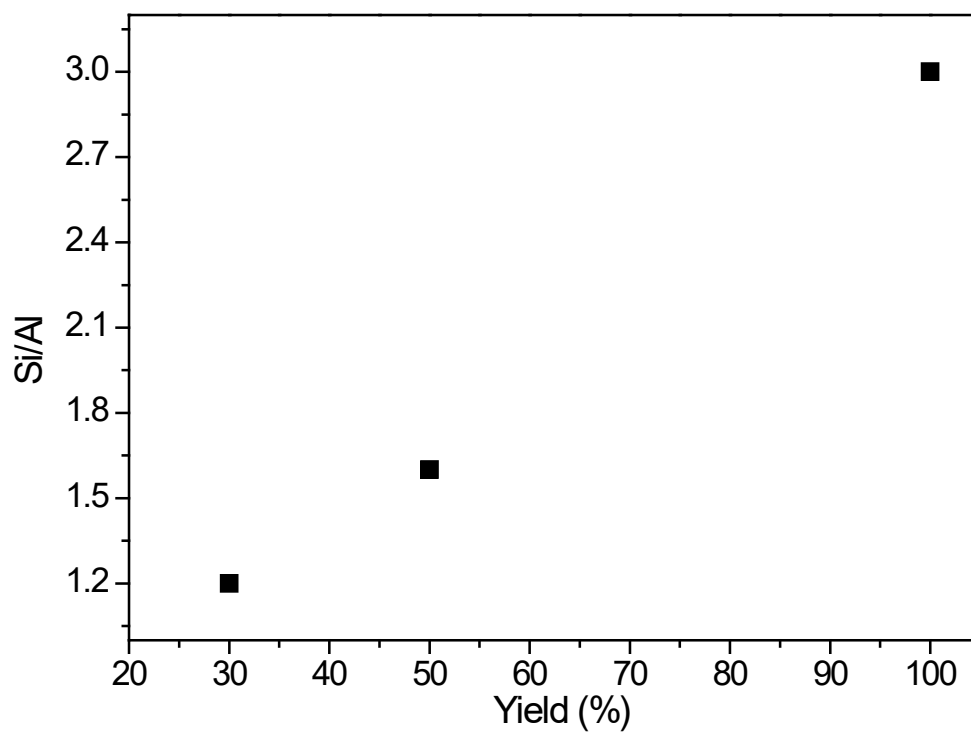

**Figure S21.** Representative example of a correlation between the Si/Al ratio and the yield of the run product.
